# Supplementary material
Source: publisher site journal article supplement (https://www.dovepress.com/article/219166)
Supplement: Supplementary file 1 [file get_supplementary_file.php]

**Supplementary Table 1.** Survey questions and response options for adults with hemophilia B

| Survey Question                                                              | Response Options                                                                                                                                                                                 |
|------------------------------------------------------------------------------|--------------------------------------------------------------------------------------------------------------------------------------------------------------------------------------------------|
| <b>Bleeding history</b>                                                      |                                                                                                                                                                                                  |
| Number of bleeds in the last year                                            | Continuous <sup>a</sup>                                                                                                                                                                          |
| Number of joint bleeds in the last year                                      | Continuous <sup>a</sup>                                                                                                                                                                          |
| Having a specific joint that bleeds more                                     | 0="No"<br>1="Yes"                                                                                                                                                                                |
| <b>Impact on work</b>                                                        |                                                                                                                                                                                                  |
| Not working (vs working full- or part-time)                                  | 0="Never worked"<br>1="Part-time employment"<br>2="Full-time employment"                                                                                                                         |
| Not working due to complications from hemophilia                             | 0="No"<br>1="Yes"                                                                                                                                                                                |
| Current treatment allows me to work                                          | 0="No"<br>1="Yes"                                                                                                                                                                                |
| Increasing negative experiences with work/career                             | 1="Large negative impact"<br>2="Moderate negative impact"<br>3="Small negative impact"<br>4="No negative impact"                                                                                 |
| Increasing satisfaction with support from employer or manager                | 1="Very satisfied"<br>2="Quite satisfied"<br>3="Not satisfied"                                                                                                                                   |
| Negative experience with telling employer or manager                         | 0="No"<br>1="Yes"                                                                                                                                                                                |
| <b>Impact on functional and recreational activities</b>                      |                                                                                                                                                                                                  |
| Increasing limitation in functional abilities and engagement in activities   | 1="Unrestricted activities"<br>2="Full school/work with limited recreational activity"<br>3="Limited school/work and recreational activity"<br>4="Limited all activities and self-care or worse" |
| Sometimes/always used cane/crutches/walker in the past 6 months              | 1="Never"<br>2="Sometimes or always"                                                                                                                                                             |
| Sometimes/always used wheelchair in the past 6 months                        | 1="Never"<br>2="Sometimes or always"                                                                                                                                                             |
| Increasing negative impact of hemophilia on ability to engage in activities  | 1="Large negative impact"<br>2="Moderate negative impact"<br>3="Small negative impact"<br>4="No negative impact"                                                                                 |
| Increasing treatment adjustment to accommodate participation in activities   | 1="Significant change"<br>2="Moderate change"<br>3="Small change"<br>4="No change"                                                                                                               |
| <b>Impact on family and relationships</b>                                    |                                                                                                                                                                                                  |
| Hemophilia affected relationship with (prospective) partners                 | 0="No"<br>1="Yes"                                                                                                                                                                                |
| Increasing satisfaction with support from partner regarding hemophilia       | 1="Very satisfied"<br>2="Less than very satisfied"                                                                                                                                               |
| Increasing satisfaction with support from friends                            | 1="Very satisfied"<br>2="Less than very satisfied"                                                                                                                                               |
| Negative experiences with telling friends about hemophilia                   | 0="No"<br>1="Yes"                                                                                                                                                                                |
| Bullied by peers because of hemophilia                                       | 0="No"<br>1="Yes"                                                                                                                                                                                |
| Negative experiences with telling colleagues at work/school about hemophilia | 0="No"<br>1="Yes"                                                                                                                                                                                |
| Bullied by colleagues at work/school because of hemophilia                   | 0="No"<br>1="Yes"                                                                                                                                                                                |
| Hemophilia affected the quality of sex life                                  | 0="No"<br>1="Yes"                                                                                                                                                                                |
| <b>Psychological/stress</b>                                                  |                                                                                                                                                                                                  |

|                                                                                       |                                                                                                                   |
|---------------------------------------------------------------------------------------|-------------------------------------------------------------------------------------------------------------------|
| Experienced stressful events: loss of job                                             | 0="No"<br>1="Yes"                                                                                                 |
| Received psychological treatment in the past 5 years                                  | 0="No"<br>1="Yes"                                                                                                 |
| Psychological treatment related to hemophilia                                         | 0="No"<br>1="Yes"                                                                                                 |
| <b>Access to and responsibility for factor/treatment</b>                              |                                                                                                                   |
| Self-responsibility for your hemophilia care (vs somebody else)                       | 1="I have the main responsibility"<br>2="Someone else has the main responsibility"                                |
| Routine factor treatment (vs on-demand)                                               | 1="Mostly on-demand"<br>2="Routine infusion"                                                                      |
| Difficulty obtaining or concerns about factor products' availability or affordability |                                                                                                                   |
| Last 5 years                                                                          | 0="No"<br>1="Yes"                                                                                                 |
| Next 5 years                                                                          | 0="No"<br>1="Yes"                                                                                                 |
| Lack of control                                                                       | Scale of 0 to 10; 0="not at all," 10="extremely well"                                                             |
| <b>Access to HTC</b>                                                                  |                                                                                                                   |
| Fewer visits to HTC in the past year                                                  | Continuous <sup>a</sup> ( $\geq 70$ removed since outlier-based frequency analysis; 18 is the next highest value) |

**Notes:** <sup>a</sup>Continuous responses were not predefined and could be any value. Negative attributes are shown in red.

**Abbreviation:** HTC, hemophilia treatment center.

**Supplementary Table 2.** Survey question and response options for caregivers of children with hemophilia B

| Survey Question                                                                                          | Response Options                                                                                                                                                                                     |
|----------------------------------------------------------------------------------------------------------|------------------------------------------------------------------------------------------------------------------------------------------------------------------------------------------------------|
| <b>Impact on work due to caring for a child with hemophilia</b>                                          |                                                                                                                                                                                                      |
| CG or SP had to leave job                                                                                | 0="No"<br>1="Yes"                                                                                                                                                                                    |
| CG or SP overlooked for promotion                                                                        | 0="No"<br>1="Yes"                                                                                                                                                                                    |
| CG or SP not hired for a job                                                                             | 0="No"<br>1="Yes"                                                                                                                                                                                    |
| CG or SP not able to work because of child's specific treatment regimen                                  | 0="No"<br>1="Yes"                                                                                                                                                                                    |
| CG or SP not able to restrict number of hours                                                            | 0="No"<br>1="Yes"                                                                                                                                                                                    |
| CG or SP not able to work flexible hours                                                                 | 0="No"<br>1="Yes"                                                                                                                                                                                    |
| <b>Impact on functional and recreational activities</b>                                                  |                                                                                                                                                                                                      |
| Increasing limitation in child's functional abilities and engagement in activities                       | 1= "Unrestricted activities"<br>2= "Full school/work with limited recreational activity"<br>3= "Limited school/work and recreational activity"<br>4= "Limited all activities and self-care or worse" |
| Increasing number of days child missed school/work because of upper extremity problems in prior 6 months | Continuous <sup>a</sup>                                                                                                                                                                              |
| Increasing negative impact on your child engaging in recreational activities                             | 1="Large negative impact"<br>2="Moderate negative impact"<br>3="Small negative impact"<br>4="No negative impact"                                                                                     |
| Increasing treatment adjustment to allow for recreational activities                                     | 1="Significant change"<br>2="Moderate change"<br>3="Small change"<br>4="No change"                                                                                                                   |
| <b>Impact on family and relationships</b>                                                                |                                                                                                                                                                                                      |
| Negative impact of hemophilia on your other children                                                     | 1="Negative impact"<br>2="No impact"<br>3="Positive impact"                                                                                                                                          |
| CG negative experiences telling someone that your child has hemophilia                                   | 0="No"<br>1="Yes"                                                                                                                                                                                    |
| Child had a negative reaction telling someone he/she has hemophilia                                      | 0="No"<br>1="Yes"                                                                                                                                                                                    |
| Child bullied as a result of having hemophilia                                                           | 0="No"<br>1="Yes"                                                                                                                                                                                    |
| <b>Psychological/stress</b>                                                                              |                                                                                                                                                                                                      |
| Received psychological treatment in the past 5 years                                                     | 0="No"<br>1="Yes"                                                                                                                                                                                    |
| Psychological treatment related to hemophilia                                                            | 0="No"<br>1="Yes"                                                                                                                                                                                    |
| Experienced stressful events                                                                             |                                                                                                                                                                                                      |
| Loss of job                                                                                              | 0="No"<br>1="Yes"                                                                                                                                                                                    |
| Financial problems                                                                                       | 0="No"<br>1="Yes"                                                                                                                                                                                    |
| Any other stressful event                                                                                | 0="No"<br>1="Yes"                                                                                                                                                                                    |
| <b>Access to factor/treatment</b>                                                                        |                                                                                                                                                                                                      |

|                                                                                       |                                                                                                            |
|---------------------------------------------------------------------------------------|------------------------------------------------------------------------------------------------------------|
| Difficulty obtaining or concerns about factor products' availability or affordability |                                                                                                            |
| Last 5 years                                                                          | 0="No"<br>1="Yes"                                                                                          |
| Next 5 years                                                                          | 0="No"<br>1="Yes"                                                                                          |
| <b>Access to HTC</b>                                                                  |                                                                                                            |
| Fewer visits to HTC in the past year                                                  | Continuous <sup>a</sup> (≥70 removed since outlier-based frequency analysis; 18 is the next highest value) |
| Increasing difficulty for child to visit the HTC                                      | 1="Very easy"<br>2="Quite easy"<br>3="Quite difficult or worse"                                            |

**Notes:** <sup>a</sup>Continuous responses were not predefined and could be any value.

**Abbreviations:** CG, caregiver; HTC, hemophilia treatment center; SP, spouse/partner.

Supplementary Table 3. Pearson correlation assessment between history of bleeds and PRO scores in adults with hemophilia B

| Survey Question                          | EQ-5D-5L Mobility  | EQ-5D-5L Self-care | EQ-5D-5L Usual Activities | EQ-5D-5L Pain/ Discomfort | EQ-5D-5L Anxiety/ Depression | EQ-5D-5L Index Score <sup>a</sup> | EQ-5D-5L Overall Health VAS Score | BPI Worst Pain <sup>b</sup> | BPI Least Pain <sup>b</sup> | BPI Average Pain <sup>b</sup> | BPI Current Pain <sup>b</sup> | BPI Pain Severity <sup>c</sup> | BPI Pain Interference <sup>d</sup> | HAL Upper Extremity <sup>e</sup> | HAL Basic Lower Extremity <sup>e</sup> | HAL Complex Lower Extremity <sup>e</sup> | HAL Overall Score <sup>e</sup> | PHQ-9 Total Score <sup>f</sup> |
|------------------------------------------|--------------------|--------------------|---------------------------|---------------------------|------------------------------|-----------------------------------|-----------------------------------|-----------------------------|-----------------------------|-------------------------------|-------------------------------|--------------------------------|------------------------------------|----------------------------------|----------------------------------------|------------------------------------------|--------------------------------|--------------------------------|
| Number of bleeds in the last year        | 0.064 <sup>g</sup> | 0.026 <sup>g</sup> | 0.015 <sup>g</sup>        | 0.154                     | 0.044 <sup>g</sup>           | -0.035 <sup>g</sup>               | 0.108 <sup>g</sup>                | 0.17                        | -0.047 <sup>g</sup>         | 0.034 <sup>g</sup>            | 0.000 <sup>g</sup>            | 0.032 <sup>g</sup>             | 0.018 <sup>g</sup>                 | 0.082 <sup>g</sup>               | -0.052 <sup>g</sup>                    | -0.228                                   | -0.049                         | 0.344                          |
| Number of joint bleeds in the last year  | 0.182              | 0.034 <sup>g</sup> | 0.025 <sup>g</sup>        | 0.164                     | 0.088 <sup>g</sup>           | -0.130 <sup>g</sup>               | 0.059 <sup>g</sup>                | 0.211                       | -0.056 <sup>g</sup>         | 0.019 <sup>g</sup>            | 0.071 <sup>g</sup>            | 0.053 <sup>g</sup>             | 0.055 <sup>g</sup>                 | -0.032 <sup>g</sup>              | -0.2                                   | -0.323                                   | -0.162                         | 0.272                          |
| Having a specific joint that bleeds more | 0.236              | 0.117 <sup>g</sup> | 0.086 <sup>g</sup>        | 0.079 <sup>g</sup>        | 0.010 <sup>g</sup>           | -0.100 <sup>g</sup>               | 0.155                             | 0.153                       | -0.124 <sup>g</sup>         | -0.059 <sup>g</sup>           | -0.027 <sup>g</sup>           | -0.031 <sup>g</sup>            | 0.060 <sup>g</sup>                 | -0.096 <sup>g</sup>              | -0.213                                 | -0.269                                   | -0.186                         | 0.109 <sup>g</sup>             |

Notes: <sup>a</sup>Range, -0.011 to 1.0 (higher scores indicate better quality of life of functional status). <sup>b</sup>Range, 0 to 10 (higher scores indicate greater pain severity or pain interference). <sup>c</sup>Pain severity score is the average of 4 severity scores (worst, least, average, current).

<sup>d</sup>Pain interference score is the average of 7 interference scores. <sup>e</sup>Range, 0 to 100 (higher scores indicate better quality of life or functional status). <sup>f</sup>Range, 0 to 27 (higher scores indicate more severe depression). <sup>g</sup>Not significant.

Abbreviations: BPI, Brief Pain Inventory v2 Short Form; HAL, Hemophilia Activities List; PHQ-9, Patient Health Questionnaire; VAS, visual analog scale.
